# Supplementary material
Source: PubMed Central journal article supplement (PMC3449364)
Supplement: 97320630008691S1.pdf [file 97320630008691S1.pdf]

## Supplementary material:

**Table 1:** Protocol to establish the reliability of research quality assessment tools

---

|   |                                                                                                                                                                                                                             |
|---|-----------------------------------------------------------------------------------------------------------------------------------------------------------------------------------------------------------------------------|
| A | train multiple readers in sharing a common view for the cognitive interpretation of each item                                                                                                                               |
| B | train the readers to read and evaluate independently and blindly the quality of a set of papers                                                                                                                             |
| C | refine the process until the inter-rater correlation coefficient and Cohen coefficient of agreement are 0.80-0.85 (over 65% shared variance)                                                                                |
| D | obtain independent and blind reading assessments from readers on reports under study                                                                                                                                        |
| E | compute means and standard deviation of scores for each question across the reports, repeat process if the coefficient of variations are greater than 5% (i.e., less than 5% error among the readers across each questions) |

---
